# Supplementary material for: 213Bi-DOTATOC receptor-targeted alpha-radionuclide therapy induces remission in neuroendocrine tumours refractory to beta radiation: a first-in-human experience
Source: Springer Nature journal article supplement (doi:10.1007/s00259-014-2857-9), 2014-07-28
Supplement: MOESM1 [file 8219342]

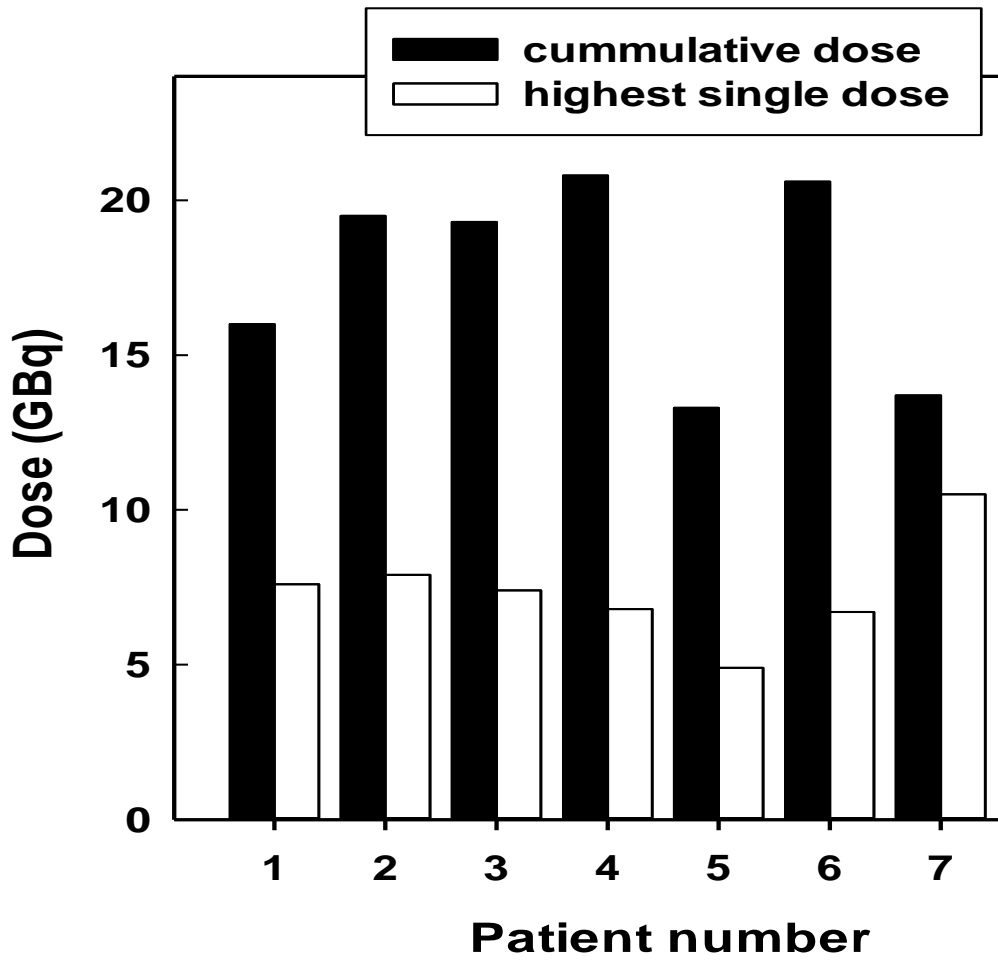

**Supplement Figure 1:** Cumulative and maximum single activities of <sup>213</sup>Bi-DOTATOC administered.
