# Supplementary material for: 213Bi-DOTATOC receptor-targeted alpha-radionuclide therapy induces remission in neuroendocrine tumours refractory to beta radiation: a first-in-human experience
Source: Springer Nature journal article supplement (doi:10.1007/s00259-014-2857-9), 2014-07-28
Supplement: MOESM3 [file 8219342]

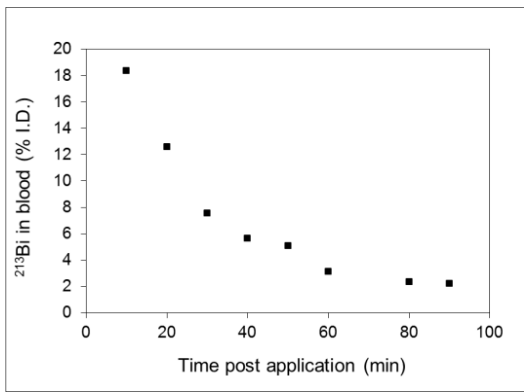

Patient-1

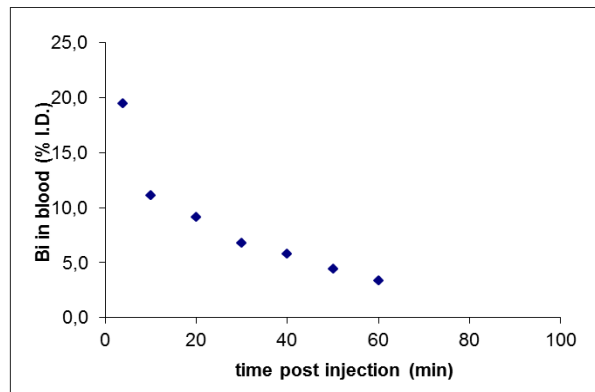

Patient-2

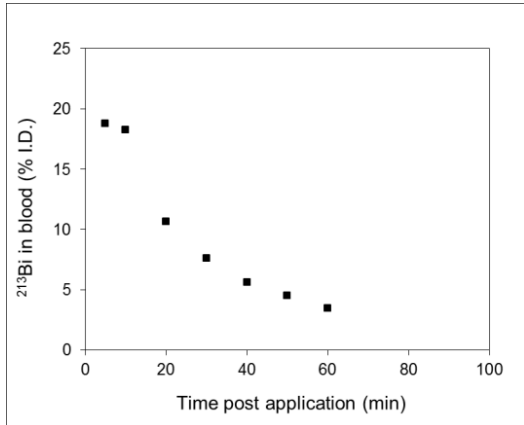

Patient-3

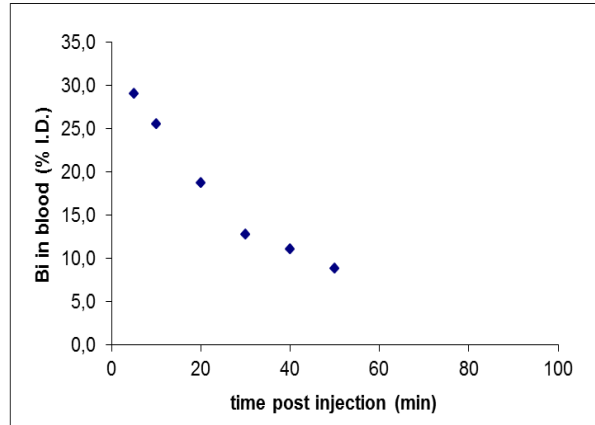

Patient-5

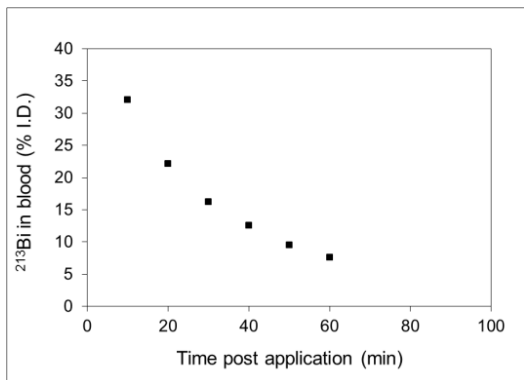

Patient-6

**Supplement Figure 3:** Time-activity-curves of <sup>213</sup>Bi-DOTATOC in blood, derived from blood samples if vessel access was successful.
