# Supplementary material for: 213Bi-DOTATOC receptor-targeted alpha-radionuclide therapy induces remission in neuroendocrine tumours refractory to beta radiation: a first-in-human experience
Source: Springer Nature journal article supplement (doi:10.1007/s00259-014-2857-9), 2014-07-28
Supplement: MOESM4 [file 8219342]

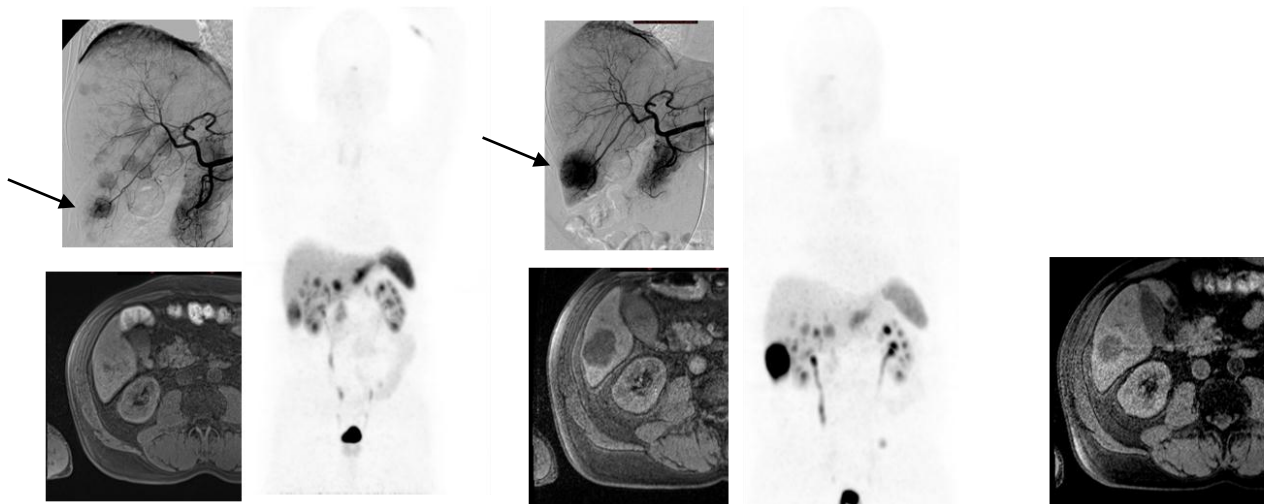

a

Date: July 2010  
Diameter of main lesion: 27 mm

b

First  $^{213}\text{Bi}$ -DOTATOC: Sep 2010  
Diameter of main lesion: 47 mm

c

Date: January 2011  
Diameter of main lesion: 27 mm

**Supplement Figure 4:** Initial tumor spread with multiple liver metastases that receive i.a. therapy with  $^{177}\text{Lu}$ -DOTATOC (a). Two month later only one lesion was massively progressive (arrows in (a) and (b)) and received i.a. therapy with 1 GBq  $^{213}\text{Bi}$ -DOTATOC (b). In follow-up imaging partial remission was also demonstrated for this particular lesion (c).
