# Supplementary material for: 213Bi-DOTATOC receptor-targeted alpha-radionuclide therapy induces remission in neuroendocrine tumours refractory to beta radiation: a first-in-human experience
Source: Springer Nature journal article supplement (doi:10.1007/s00259-014-2857-9), 2014-07-28
Supplement: MOESM5 [file 8219342]

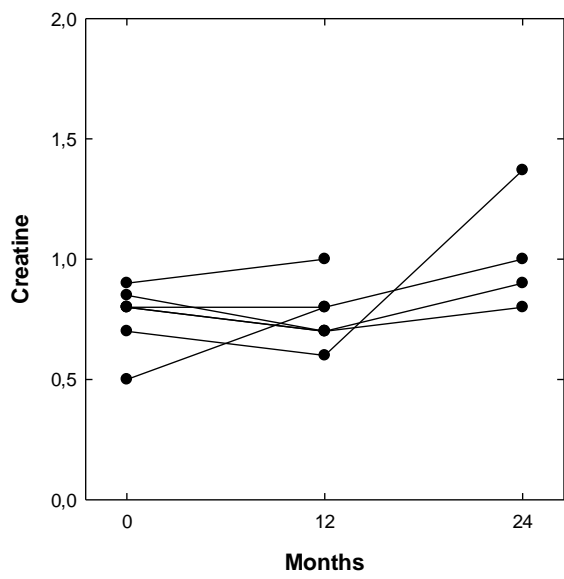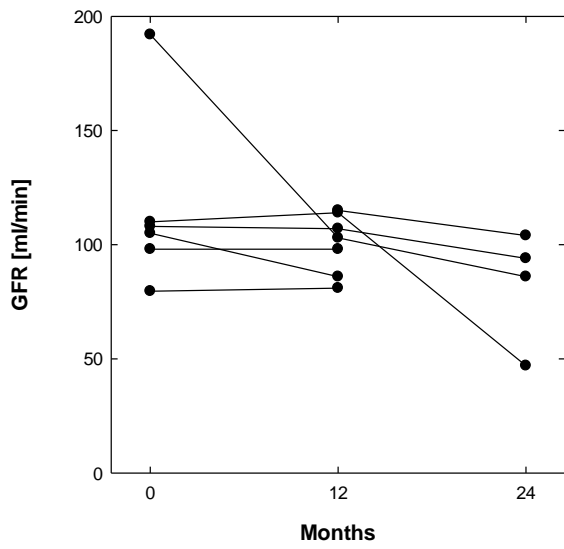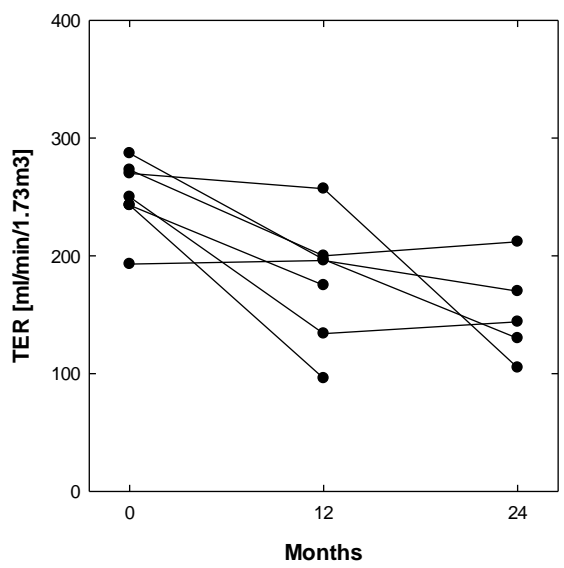

|       |               | <b>Hb</b> | <b>PLT</b> | <b>WBC</b> | <b>Crea</b> | <b>GFR</b> | <b>TER</b> |
|-------|---------------|-----------|------------|------------|-------------|------------|------------|
| Pt. 1 | baseline      | 12.8      | 195        | 4.7        | 0.9         | 79,6       | 243        |
|       | 12 Mo         | 13.0      | 296        | 6          | 1           | 81         | 175        |
|       | PFS 17 months |           |            |            |             |            |            |
| Pt. 2 | baseline      | 13.3      | 241        | 4.4        | 0.8         | 192        | 193        |
|       | 12 Mo         | 10.9      | 233        | 5.7        | 0.7         | 103        | 196        |
|       | 24 Mo         | 7.0       | 94         | 2.9        | 0.8         | 86         | 170        |
| Pt. 3 | baseline      | 11.5      | 283        | 6          | 0.7         | 110        | 250        |
|       | 12 Mo         | 10.2      | 214        | 4.7        | 0.6         | 114        | 134        |
|       | 24 Mo         | 8.7       | 287        | 5.5        | 1.37        | 47         | 144        |
| Pt. 4 | baseline      | 12.3      | 237        | 4.5        | 0.8         | n/a        | 270        |
|       | 12 Mo         | 13        | 163        | 3.8        | 0.7         | 115        | 257        |
|       | 24 Mo         | 12.7      | 166        | 3.4        | 0.9         | 104        | 105        |
| Pt. 5 | baseline      | 12.3      | 268        | 5.4        | 0.85        | 98         | 287        |
|       | 12 Mo         | 12.7      | 345        | 5.8        | 0.7         | 98         | 197        |
|       | 24 Mo         | 10.8      | 342        | 5.4        | n/a         | n/a        | 130        |
| Pt. 6 | baseline      | 12.3      | 171        | 3.7        | 0.8         | 108        | 273        |
|       | 12 Mo         | 12.1      | 148        | 4.1        | 0.8         | 107        | 200        |
|       | 24 Mo         | 11.0      | 158        | 5          | 1           | 94         | 212        |
| Pt. 7 | baseline      | 11.7      | 253        | 3.5        | 0.5         | 105        | 243        |
|       | 12 Mo         | 9.8       | 272        | 3.3        | 0.8         | 86         | 96         |
|       | PFS 15 months |           |            |            |             |            |            |

**Supplement Figure 5:** Absolute values for hemoglobin (Hb), platelets (PLT), white blood cells (WBC), glomerular filtration rate (GFR), tubular excretion rate (TER) and serum creatinine (Crea) at baseline, 12 months and 24 months after initiation of TAT.
