# Supplementary figures and images for: 213Bi-DOTATOC receptor-targeted alpha-radionuclide therapy induces remission in neuroendocrine tumours refractory to beta radiation: a first-in-human experience
Source: Springer Nature journal article supplement (doi:10.1007/s00259-014-2857-9), 2014-07-28

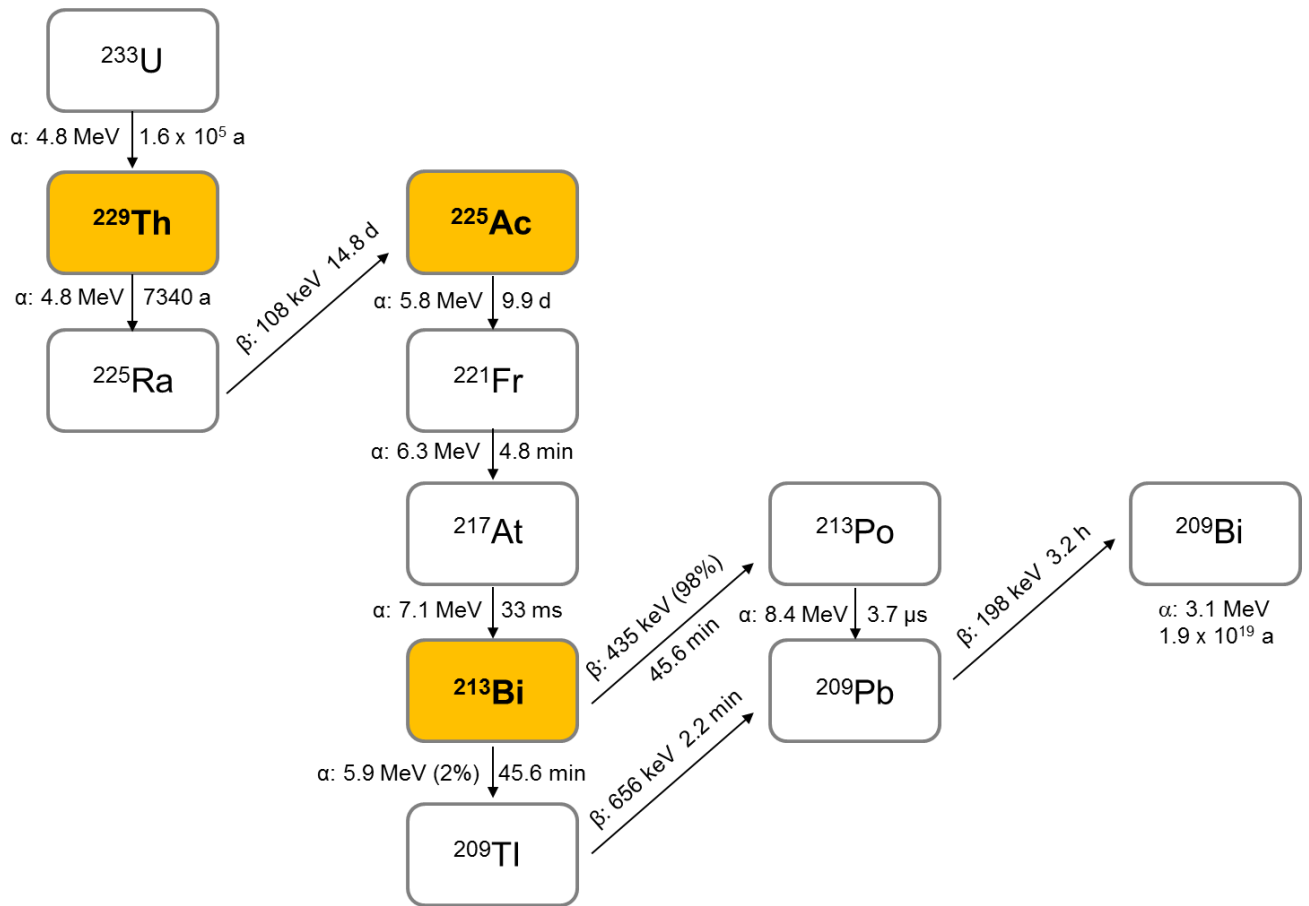

**Supplement Figure 2:** Decay schema of the  $^{229}\text{Th} / ^{225}\text{Ac} / ^{213}\text{Bi}$  radionuclide generator system

Supplement: MOESM2 [file 8219342]
